# Supplementary material
Source: publisher figshare collection journal article supplement (https://gsapubs.figshare.com/ndownloader/files/26669582)
Supplement: Supplementary file 1 [file 26669582]

## Sheet: all
Supplementary Data 5. Melanosome measurements (nm) in untreated and matured samples from the african clawed frog skin and liver.
Replicate	tissue	#	lenght	width	ratio
Frog_1	Liver	1	800	480	0.6
Frog_1	Liver	2	620	600	0.97
Frog_1	Liver	3	770	410	0.53
Frog_1	Liver	4	680	480	0.71
Frog_1	Liver	5	690	380	0.55
Frog_1	Liver	6	550	440	0.8
Frog_1	Liver	7	780	480	0.62
Frog_1	Liver	8	550	540	0.98
Frog_1	Liver	9	660	320	0.48
Frog_1	Liver	10	760	460	0.61
Frog_1	Liver	11	810	560	0.69
Frog_1	Liver	12	630	480	0.76
Frog_1	Liver	13	920	480	0.52
Frog_1	Liver	14	980	680	0.69
Frog_1	Liver	15	780	420	0.54
Frog_1	Liver	16	650	520	0.8
Frog_1	Liver	17	670	490	0.73
Frog_1	Liver	18	580	560	0.97
Frog_1	Liver	19	640	390	0.61
Frog_1	Liver	20	680	450	0.66
Frog_1	Liver	21	810	610	0.75
Frog_1	Liver	22	720	550	0.76
Frog_1	Liver	23	740	490	0.66
Frog_1	Liver	24	580	500	0.86
Frog_1	Liver	25	520	520	1
Frog_1	Liver	26	770	500	0.65
Frog_1	Liver	27	790	570	0.72
Frog_1	Liver	28	520	470	0.9
Frog_1	Liver	28	1000	630	0.63
Frog_1	Liver	30	620	460	0.74
Frog_1	Liver	31	950	500	0.53
Frog_1	Liver	32	1000	600	0.6
Frog_1	Liver	33	750	680	0.91
Frog_1	Liver	34	890	640	0.72
Frog_1	Liver	35	810	490	0.6
Frog_1	Liver	36	740	450	0.61
Frog_1	Liver	37	840	530	0.63
Frog_1	Liver	38	1370	730	0.53
Frog_1	Liver	39	1160	710	0.61
Frog_1	Liver	40	800	690	0.86
Frog_1	Liver	41	720	440	0.61
Frog_1	Liver	42	1160	630	0.54
Frog_1	Liver	43	660	550	0.83
Frog_1	Liver	44	790	420	0.53
Frog_1	Liver	45	690	620	0.9
Frog_1	Liver	46	670	540	0.81
Frog_1	Liver	47	770	510	0.66
Frog_1	Liver	48	850	660	0.78
Frog_1	Liver	49	610	500	0.82
Frog_1	Liver	50	710	640	0.9
Frog_2	Liver	1	850	400	0.47
Frog_2	Liver	2	530	380	0.72
Frog_2	Liver	3	650	550	0.85
Frog_2	Liver	4	660	600	0.91
Frog_2	Liver	5	700	470	0.67
Frog_2	Liver	6	590	510	0.86
Frog_2	Liver	7	750	520	0.69
Frog_2	Liver	8	650	620	0.95
Frog_2	Liver	9	610	450	0.74
Frog_2	Liver	10	740	430	0.58
Frog_2	Liver	11	610	470	0.77
Frog_2	Liver	12	650	400	0.62
Frog_2	Liver	13	800	700	0.88
Frog_2	Liver	14	620	560	0.9
Frog_2	Liver	15	720	450	0.63
Frog_2	Liver	16	620	530	0.85
Frog_2	Liver	17	850	510	0.6
Frog_2	Liver	18	800	510	0.64
Frog_2	Liver	19	880	510	0.58
Frog_2	Liver	20	830	570	0.69
Frog_2	Liver	21	600	390	0.65
Frog_2	Liver	22	600	520	0.87
Frog_2	Liver	23	480	390	0.81
Frog_2	Liver	24	740	590	0.8
Frog_2	Liver	25	730	520	0.71
Frog_2	Liver	26	790	560	0.71
Frog_2	Liver	27	670	430	0.64
Frog_2	Liver	28	800	470	0.59
Frog_2	Liver	28	910	590	0.65
Frog_2	Liver	30	590	380	0.64
Frog_2	Liver	31	580	440	0.76
Frog_2	Liver	32	450	360	0.8
Frog_2	Liver	33	790	430	0.54
Frog_2	Liver	34	940	570	0.61
Frog_2	Liver	35	730	510	0.7
Frog_2	Liver	36	750	460	0.61
Frog_2	Liver	37	670	420	0.63
Frog_2	Liver	38	780	510	0.65
Frog_2	Liver	39	730	500	0.68
Frog_2	Liver	40	750	550	0.73
Frog_2	Liver	41	790	490	0.62
Frog_2	Liver	42	640	480	0.75
Frog_2	Liver	43	740	430	0.58
Frog_2	Liver	44	860	520	0.6
Frog_2	Liver	45	800	610	0.76
Frog_2	Liver	46	740	430	0.58
Frog_2	Liver	47	750	450	0.6
Frog_2	Liver	48	980	590	0.6
Frog_2	Liver	49	790	510	0.65
Frog_2	Liver	50	1000	600	0.6
Frog_3	Liver	1	680	510	0.75
Frog_3	Liver	2	640	450	0.7
Frog_3	Liver	3	620	520	0.84
Frog_3	Liver	4	480	400	0.83
Frog_3	Liver	5	590	460	0.78
Frog_3	Liver	6	570	450	0.79
Frog_3	Liver	7	730	420	0.58
Frog_3	Liver	8	610	370	0.61
Frog_3	Liver	9	710	470	0.66
Frog_3	Liver	10	720	520	0.72
Frog_3	Liver	11	650	470	0.72
Frog_3	Liver	12	830	600	0.72
Frog_3	Liver	13	540	450	0.83
Frog_3	Liver	14	550	490	0.89
Frog_3	Liver	15	560	480	0.86
Frog_3	Liver	16	630	550	0.87
Frog_3	Liver	17	780	530	0.68
Frog_3	Liver	18	980	690	0.7
Frog_3	Liver	19	630	530	0.84
Frog_3	Liver	20	630	440	0.7
Frog_3	Liver	21	840	550	0.65
Frog_3	Liver	22	840	480	0.57
Frog_3	Liver	23	630	550	0.87
Frog_3	Liver	24	630	520	0.83
Frog_3	Liver	25	1030	520	0.5
Frog_3	Liver	26	580	520	0.9
Frog_3	Liver	27	730	640	0.88
Frog_3	Liver	28	570	390	0.68
Frog_3	Liver	28	820	480	0.59
Frog_3	Liver	30	710	490	0.69
Frog_3	Liver	31	870	600	0.69
Frog_3	Liver	32	740	520	0.7
Frog_3	Liver	33	700	520	0.74
Frog_3	Liver	34	580	570	0.98
Frog_3	Liver	35	700	500	0.71
Frog_3	Liver	36	480	480	1
Frog_3	Liver	37	680	570	0.84
Frog_3	Liver	38	610	430	0.7
Frog_3	Liver	39	630	510	0.81
Frog_3	Liver	40	680	520	0.76
Frog_3	Liver	41	570	500	0.88
Frog_3	Liver	42	640	480	0.75
Frog_3	Liver	43	830	570	0.69
Frog_3	Liver	44	700	460	0.66
Frog_3	Liver	45	670	500	0.75
Frog_3	Liver	46	490	450	0.92
Frog_3	Liver	47	680	470	0.69
Frog_3	Liver	48	750	610	0.81
Frog_3	Liver	49	600	440	0.73
Frog_3	Liver	50	760	510	0.67
Frog_1	Skin	1	470	350	0.74
Frog_1	Skin	2	780	460	0.59
Frog_1	Skin	3	500	440	0.88
Frog_1	Skin	4	700	400	0.57
Frog_1	Skin	5	620	420	0.68
Frog_1	Skin	6	560	400	0.71
Frog_1	Skin	7	600	500	0.83
Frog_1	Skin	8	500	440	0.88
Frog_1	Skin	9	560	340	0.61
Frog_1	Skin	10	700	400	0.57
Frog_1	Skin	11	550	330	0.6
Frog_1	Skin	12	730	450	0.62
Frog_1	Skin	13	650	430	0.66
Frog_1	Skin	14	630	440	0.7
Frog_1	Skin	15	600	400	0.67
Frog_1	Skin	16	630	400	0.63
Frog_1	Skin	17	500	400	0.8
Frog_1	Skin	18	570	200	0.35
Frog_1	Skin	19	780	460	0.59
Frog_1	Skin	20	660	400	0.61
Frog_1	Skin	21	560	340	0.61
Frog_1	Skin	22	600	400	0.67
Frog_1	Skin	23	600	460	0.77
Frog_1	Skin	24	500	420	0.84
Frog_1	Skin	25	630	370	0.59
Frog_1	Skin	26	600	470	0.78
Frog_1	Skin	27	560	500	0.89
Frog_1	Skin	28	640	530	0.83
Frog_1	Skin	28	700	380	0.54
Frog_1	Skin	30	550	410	0.75
Frog_1	Skin	31	610	400	0.66
Frog_1	Skin	32	560	360	0.64
Frog_1	Skin	33	630	370	0.59
Frog_1	Skin	34	670	390	0.58
Frog_1	Skin	35	600	300	0.5
Frog_1	Skin	36	560	410	0.73
Frog_1	Skin	37	630	470	0.75
Frog_1	Skin	38	750	300	0.4
Frog_1	Skin	39	620	450	0.73
Frog_1	Skin	40	720	370	0.51
Frog_1	Skin	41	600	350	0.58
Frog_1	Skin	42	700	470	0.67
Frog_1	Skin	43	700	430	0.61
Frog_1	Skin	44	820	470	0.57
Frog_1	Skin	45	740	400	0.54
Frog_1	Skin	46	650	370	0.57
Frog_1	Skin	47	750	380	0.51
Frog_1	Skin	48	580	460	0.79
Frog_1	Skin	49	730	370	0.51
Frog_1	Skin	50	630	440	0.7
Frog_2	Skin	1	690	490	0.71
Frog_2	Skin	2	790	510	0.65
Frog_2	Skin	3	740	470	0.64
Frog_2	Skin	4	710	460	0.65
Frog_2	Skin	5	790	540	0.68
Frog_2	Skin	6	710	390	0.55
Frog_2	Skin	7	840	510	0.61
Frog_2	Skin	8	740	500	0.68
Frog_2	Skin	9	740	440	0.59
Frog_2	Skin	10	610	540	0.89
Frog_2	Skin	11	770	510	0.66
Frog_2	Skin	12	740	720	0.97
Frog_2	Skin	13	1100	710	0.65
Frog_2	Skin	14	740	500	0.68
Frog_2	Skin	15	900	420	0.47
Frog_2	Skin	16	710	510	0.72
Frog_2	Skin	17	560	400	0.71
Frog_2	Skin	18	600	360	0.6
Frog_2	Skin	19	700	440	0.63
Frog_2	Skin	20	710	470	0.66
Frog_2	Skin	21	690	540	0.78
Frog_2	Skin	22	780	590	0.76
Frog_2	Skin	23	800	540	0.68
Frog_2	Skin	24	640	480	0.75
Frog_2	Skin	25	730	520	0.71
Frog_2	Skin	26	640	440	0.69
Frog_2	Skin	27	740	490	0.66
Frog_2	Skin	28	760	460	0.61
Frog_2	Skin	28	770	400	0.52
Frog_2	Skin	30	880	550	0.63
Frog_2	Skin	31	800	500	0.63
Frog_2	Skin	32	790	590	0.75
Frog_2	Skin	33	720	500	0.69
Frog_2	Skin	34	790	450	0.57
Frog_2	Skin	35	890	520	0.58
Frog_2	Skin	36	760	420	0.55
Frog_2	Skin	37	630	520	0.83
Frog_2	Skin	38	790	720	0.91
Frog_2	Skin	39	800	540	0.68
Frog_2	Skin	40	750	500	0.67
Frog_2	Skin	41	570	450	0.79
Frog_2	Skin	42	940	570	0.61
Frog_2	Skin	43	850	490	0.58
Frog_2	Skin	44	860	540	0.63
Frog_2	Skin	45	730	380	0.52
Frog_2	Skin	46	650	530	0.82
Frog_2	Skin	47	960	610	0.64
Frog_2	Skin	48	750	460	0.61
Frog_2	Skin	49	760	520	0.68
Frog_2	Skin	50	590	390	0.66
Frog_3	Skin	1	770	540	0.7
Frog_3	Skin	2	750	550	0.73
Frog_3	Skin	3	630	450	0.71
Frog_3	Skin	4	530	400	0.75
Frog_3	Skin	5	740	540	0.73
Frog_3	Skin	6	740	460	0.62
Frog_3	Skin	7	770	560	0.73
Frog_3	Skin	8	630	370	0.59
Frog_3	Skin	9	660	490	0.74
Frog_3	Skin	10	600	370	0.62
Frog_3	Skin	11	850	490	0.58
Frog_3	Skin	12	620	420	0.68
Frog_3	Skin	13	690	500	0.72
Frog_3	Skin	14	630	570	0.9
Frog_3	Skin	15	580	450	0.78
Frog_3	Skin	16	780	590	0.76
Frog_3	Skin	17	730	490	0.67
Frog_3	Skin	18	740	560	0.76
Frog_3	Skin	19	700	430	0.61
Frog_3	Skin	20	840	580	0.69
Frog_3	Skin	21	620	530	0.85
Frog_3	Skin	22	630	510	0.81
Frog_3	Skin	23	690	500	0.72
Frog_3	Skin	24	700	490	0.7
Frog_3	Skin	25	830	520	0.63
Frog_3	Skin	26	770	470	0.61
Frog_3	Skin	27	860	470	0.55
Frog_3	Skin	28	570	440	0.77
Frog_3	Skin	28	570	560	0.98
Frog_3	Skin	30	830	490	0.59
Frog_3	Skin	31	670	470	0.7
Frog_3	Skin	32	790	490	0.62
Frog_3	Skin	33	740	440	0.59
Frog_3	Skin	34	750	520	0.69
Frog_3	Skin	35	680	480	0.71
Frog_3	Skin	36	810	470	0.58
Frog_3	Skin	37	600	580	0.97
Frog_3	Skin	38	630	580	0.92
Frog_3	Skin	39	640	480	0.75
Frog_3	Skin	40	680	480	0.71
Frog_3	Skin	41	750	570	0.76
Frog_3	Skin	42	620	510	0.82
Frog_3	Skin	43	810	460	0.57
Frog_3	Skin	44	630	560	0.89
Frog_3	Skin	45	650	500	0.77
Frog_3	Skin	46	660	560	0.85
Frog_3	Skin	47	540	510	0.94
Frog_3	Skin	48	730	560	0.77
Frog_3	Skin	49	660	390	0.59
Frog_3	Skin	50	550	530	0.96
Mat_Cu_Liver_1	liver	1	870	580	0.666667
Mat_Cu_Liver_1	liver	2	590	440	0.745763
Mat_Cu_Liver_1	liver	3	570	420	0.736842
Mat_Cu_Liver_1	liver	4	780	530	0.679487
Mat_Cu_Liver_1	liver	5	810	460	0.567901
Mat_Cu_Liver_1	liver	6	860	590	0.686047
Mat_Cu_Liver_1	liver	7	660	630	0.954545
Mat_Cu_Liver_1	liver	8	670	660	0.985075
Mat_Cu_Liver_1	liver	9	650	610	0.938462
Mat_Cu_Liver_1	liver	10	830	550	0.662651
Mat_Cu_Liver_1	liver	11	720	560	0.777778
Mat_Cu_Liver_1	liver	12	770	510	0.662338
Mat_Cu_Liver_1	liver	13	620	470	0.758065
Mat_Cu_Liver_1	liver	14	740	500	0.675676
Mat_Cu_Liver_1	liver	15	590	470	0.79661
Mat_Cu_Liver_1	liver	16	690	500	0.724638
Mat_Cu_Liver_1	liver	17	870	510	0.586207
Mat_Cu_Liver_1	liver	18	810	620	0.765432
Mat_Cu_Liver_1	liver	19	560	410	0.732143
Mat_Cu_Liver_1	liver	20	500	390	0.78
Mat_Cu_Liver_1	liver	21	510	460	0.901961
Mat_Cu_Liver_1	liver	22	480	440	0.916667
Mat_Cu_Liver_1	liver	23	550	370	0.672727
Mat_Cu_Liver_1	liver	24	520	430	0.826923
Mat_Cu_Liver_1	liver	25	510	350	0.686275
Mat_Cu_Liver_1	liver	26	560	440	0.785714
Mat_Cu_Liver_1	liver	27	580	450	0.775862
Mat_Cu_Liver_1	liver	28	570	420	0.736842
Mat_Cu_Liver_1	liver	29	580	430	0.741379
Mat_Cu_Liver_1	liver	30	460	440	0.956522
Mat_Cu_Liver_1	liver	31	460	440	0.956522
Mat_Cu_Liver_1	liver	32	460	300	0.652174
Mat_Cu_Liver_1	liver	33	530	410	0.773585
Mat_Cu_Liver_1	liver	34	470	390	0.829787
Mat_Cu_Liver_1	liver	35	540	350	0.648148
Mat_Cu_Liver_1	liver	36	500	420	0.84
Mat_Cu_Liver_1	liver	37	470	400	0.851064
Mat_Cu_Liver_1	liver	38	590	360	0.610169
Mat_Cu_Liver_1	liver	39	640	400	0.625
Mat_Cu_Liver_1	liver	40	660	480	0.727273
Mat_Cu_Liver_1	liver	41	470	420	0.893617
Mat_Cu_Liver_1	liver	42	490	370	0.755102
Mat_Cu_Liver_1	liver	43	640	520	0.8125
Mat_Cu_Liver_1	liver	44	560	310	0.553571
Mat_Cu_Liver_1	liver	45	390	360	0.923077
Mat_Cu_Liver_1	liver	46	500	380	0.76
Mat_Cu_Liver_1	liver	47	480	360	0.75
Mat_Cu_Liver_1	liver	48	590	440	0.745763
Mat_Cu_Liver_1	liver	49	540	460	0.851852
Mat_Cu_Liver_1	liver	50	620	470	0.758065
Mat_Cu_Liver_2	liver	1	880	540	0.613636
Mat_Cu_Liver_2	liver	2	680	600	0.882353
Mat_Cu_Liver_2	liver	3	860	580	0.674419
Mat_Cu_Liver_2	liver	4	800	580	0.725
Mat_Cu_Liver_2	liver	5	1020	700	0.686275
Mat_Cu_Liver_2	liver	6	670	560	0.835821
Mat_Cu_Liver_2	liver	7	720	580	0.805556
Mat_Cu_Liver_2	liver	8	700	610	0.871429
Mat_Cu_Liver_2	liver	9	760	540	0.710526
Mat_Cu_Liver_2	liver	10	1050	840	0.8
Mat_Cu_Liver_2	liver	11	840	660	0.785714
Mat_Cu_Liver_2	liver	12	720	600	0.833333
Mat_Cu_Liver_2	liver	13	650	640	0.984615
Mat_Cu_Liver_2	liver	14	790	660	0.835443
Mat_Cu_Liver_2	liver	15	840	660	0.785714
Mat_Cu_Liver_2	liver	16	700	460	0.657143
Mat_Cu_Liver_2	liver	17	790	600	0.759494
Mat_Cu_Liver_2	liver	18	1100	650	0.590909
Mat_Cu_Liver_2	liver	19	780	580	0.74359
Mat_Cu_Liver_2	liver	20	700	550	0.785714
Mat_Cu_Liver_2	liver	21	800	570	0.7125
Mat_Cu_Liver_2	liver	22	650	550	0.846154
Mat_Cu_Liver_2	liver	23	740	620	0.837838
Mat_Cu_Liver_2	liver	24	680	540	0.794118
Mat_Cu_Liver_2	liver	25	800	560	0.7
Mat_Cu_Liver_2	liver	26	720	580	0.805556
Mat_Cu_Liver_2	liver	27	820	610	0.743902
Mat_Cu_Liver_2	liver	28	630	590	0.936508
Mat_Cu_Liver_2	liver	29	950	660	0.694737
Mat_Cu_Liver_2	liver	30	880	720	0.818182
Mat_Cu_Liver_2	liver	31	740	550	0.743243
Mat_Cu_Liver_2	liver	32	750	400	0.533333
Mat_Cu_Liver_2	liver	33	950	720	0.757895
Mat_Cu_Liver_2	liver	34	870	680	0.781609
Mat_Cu_Liver_2	liver	35	610	530	0.868852
Mat_Cu_Liver_2	liver	36	770	560	0.727273
Mat_Cu_Liver_2	liver	37	660	610	0.924242
Mat_Cu_Liver_2	liver	38	890	560	0.629213
Mat_Cu_Liver_2	liver	39	660	530	0.80303
Mat_Cu_Liver_2	liver	40	1060	600	0.566038
Mat_Cu_Liver_2	liver	41	760	670	0.881579
Mat_Cu_Liver_2	liver	42	890	600	0.674157
Mat_Cu_Liver_2	liver	43	750	470	0.626667
Mat_Cu_Liver_2	liver	44	770	550	0.714286
Mat_Cu_Liver_2	liver	45	850	570	0.670588
Mat_Cu_Liver_2	liver	46	660	500	0.757576
Mat_Cu_Liver_2	liver	47	780	540	0.692308
Mat_Cu_Liver_2	liver	48	780	410	0.525641
Mat_Cu_Liver_2	liver	49	850	590	0.694118
Mat_Cu_Liver_2	liver	50	730	550	0.753425
Mat_Cu_Liver_3	liver	1	520	360	0.692308
Mat_Cu_Liver_3	liver	2	430	320	0.744186
Mat_Cu_Liver_3	liver	3	510	250	0.490196
Mat_Cu_Liver_3	liver	4	420	340	0.809524
Mat_Cu_Liver_3	liver	5	450	300	0.666667
Mat_Cu_Liver_3	liver	6	500	300	0.6
Mat_Cu_Liver_3	liver	7	410	380	0.926829
Mat_Cu_Liver_3	liver	8	440	300	0.681818
Mat_Cu_Liver_3	liver	9	370	330	0.891892
Mat_Cu_Liver_3	liver	10	590	490	0.830508
Mat_Cu_Liver_3	liver	11	570	410	0.719298
Mat_Cu_Liver_3	liver	12	380	350	0.921053
Mat_Cu_Liver_3	liver	13	620	520	0.83871
Mat_Cu_Liver_3	liver	14	470	310	0.659574
Mat_Cu_Liver_3	liver	15	430	360	0.837209
Mat_Cu_Liver_3	liver	16	520	330	0.634615
Mat_Cu_Liver_3	liver	17	630	400	0.634921
Mat_Cu_Liver_3	liver	18	580	480	0.827586
Mat_Cu_Liver_3	liver	19	590	440	0.745763
Mat_Cu_Liver_3	liver	20	650	370	0.569231
Mat_Cu_Liver_3	liver	21	540	350	0.648148
Mat_Cu_Liver_3	liver	22	430	400	0.930233
Mat_Cu_Liver_3	liver	23	470	300	0.638298
Mat_Cu_Liver_3	liver	24	520	360	0.692308
Mat_Cu_Liver_3	liver	25	530	330	0.622642
Mat_Cu_Liver_3	liver	26	440	320	0.727273
Mat_Cu_Liver_3	liver	27	460	300	0.652174
Mat_Cu_Liver_3	liver	28	410	350	0.853659
Mat_Cu_Liver_3	liver	29	580	390	0.672414
Mat_Cu_Liver_3	liver	30	510	360	0.705882
Mat_Cu_Liver_3	liver	31	500	350	0.7
Mat_Cu_Liver_3	liver	32	500	330	0.66
Mat_Cu_Liver_3	liver	33	520	470	0.903846
Mat_Cu_Liver_3	liver	34	560	390	0.696429
Mat_Cu_Liver_3	liver	35	620	440	0.709677
Mat_Cu_Liver_3	liver	36	590	400	0.677966
Mat_Cu_Liver_3	liver	37	520	420	0.807692
Mat_Cu_Liver_3	liver	38	560	450	0.803571
Mat_Cu_Liver_3	liver	39	760	560	0.736842
Mat_Cu_Liver_3	liver	40	750	390	0.52
Mat_Cu_Liver_3	liver	41	770	340	0.441558
Mat_Cu_Liver_3	liver	42	700	480	0.685714
Mat_Cu_Liver_3	liver	43	530	340	0.641509
Mat_Cu_Liver_3	liver	44	530	400	0.754717
Mat_Cu_Liver_3	liver	45	570	410	0.719298
Mat_Cu_Liver_3	liver	46	750	410	0.546667
Mat_Cu_Liver_3	liver	47	520	350	0.673077
Mat_Cu_Liver_3	liver	48	750	520	0.693333
Mat_Cu_Liver_3	liver	49	580	450	0.775862
Mat_Cu_Liver_3	liver	50	530	370	0.698113
Mat_Cu_Skin_1	skin	1	610	490	0.803279
Mat_Cu_Skin_1	skin	2	630	460	0.730159
Mat_Cu_Skin_1	skin	3	520	420	0.807692
Mat_Cu_Skin_1	skin	4	620	430	0.693548
Mat_Cu_Skin_1	skin	5	750	560	0.746667
Mat_Cu_Skin_1	skin	6	620	520	0.83871
Mat_Cu_Skin_1	skin	7	760	510	0.671053
Mat_Cu_Skin_1	skin	8	670	420	0.626866
Mat_Cu_Skin_1	skin	9	700	460	0.657143
Mat_Cu_Skin_1	skin	10	770	410	0.532468
Mat_Cu_Skin_1	skin	11	760	410	0.539474
Mat_Cu_Skin_1	skin	12	760	410	0.539474
Mat_Cu_Skin_1	skin	13	660	450	0.681818
Mat_Cu_Skin_1	skin	14	650	400	0.615385
Mat_Cu_Skin_1	skin	15	550	400	0.727273
Mat_Cu_Skin_1	skin	16	610	420	0.688525
Mat_Cu_Skin_1	skin	17	680	440	0.647059
Mat_Cu_Skin_1	skin	18	710	410	0.577465
Mat_Cu_Skin_1	skin	19	710	620	0.873239
Mat_Cu_Skin_1	skin	20	750	440	0.586667
Mat_Cu_Skin_1	skin	21	700	520	0.742857
Mat_Cu_Skin_1	skin	22	580	540	0.931034
Mat_Cu_Skin_1	skin	23	650	480	0.738462
Mat_Cu_Skin_1	skin	24	640	450	0.703125
Mat_Cu_Skin_1	skin	25	800	450	0.5625
Mat_Cu_Skin_1	skin	26	730	450	0.616438
Mat_Cu_Skin_1	skin	27	700	460	0.657143
Mat_Cu_Skin_1	skin	28	830	460	0.554217
Mat_Cu_Skin_1	skin	29	780	550	0.705128
Mat_Cu_Skin_1	skin	30	660	480	0.727273
Mat_Cu_Skin_1	skin	31	720	480	0.666667
Mat_Cu_Skin_1	skin	32	690	460	0.666667
Mat_Cu_Skin_1	skin	33	860	480	0.55814
Mat_Cu_Skin_1	skin	34	560	550	0.982143
Mat_Cu_Skin_1	skin	35	700	580	0.828571
Mat_Cu_Skin_1	skin	36	670	410	0.61194
Mat_Cu_Skin_1	skin	37	590	450	0.762712
Mat_Cu_Skin_1	skin	38	670	450	0.671642
Mat_Cu_Skin_1	skin	39	700	410	0.585714
Mat_Cu_Skin_1	skin	40	520	410	0.788462
Mat_Cu_Skin_1	skin	41	660	460	0.69697
Mat_Cu_Skin_1	skin	42	770	470	0.61039
Mat_Cu_Skin_1	skin	43	550	520	0.945455
Mat_Cu_Skin_1	skin	44	810	380	0.469136
Mat_Cu_Skin_1	skin	45	740	490	0.662162
Mat_Cu_Skin_1	skin	46	640	520	0.8125
Mat_Cu_Skin_1	skin	47	720	440	0.611111
Mat_Cu_Skin_1	skin	48	690	490	0.710145
Mat_Cu_Skin_1	skin	49	630	370	0.587302
Mat_Cu_Skin_1	skin	50	680	430	0.632353
Mat_Cu_Skin_2	skin	1	740	530	0.716216
Mat_Cu_Skin_2	skin	2	560	460	0.821429
Mat_Cu_Skin_2	skin	3	570	470	0.824561
Mat_Cu_Skin_2	skin	4	610	470	0.770492
Mat_Cu_Skin_2	skin	5	660	440	0.666667
Mat_Cu_Skin_2	skin	6	620	510	0.822581
Mat_Cu_Skin_2	skin	7	720	720	1
Mat_Cu_Skin_2	skin	8	730	460	0.630137
Mat_Cu_Skin_2	skin	9	580	380	0.655172
Mat_Cu_Skin_2	skin	10	680	460	0.676471
Mat_Cu_Skin_2	skin	11	700	600	0.857143
Mat_Cu_Skin_2	skin	12	650	480	0.738462
Mat_Cu_Skin_2	skin	13	610	480	0.786885
Mat_Cu_Skin_2	skin	14	670	410	0.61194
Mat_Cu_Skin_2	skin	15	700	420	0.6
Mat_Cu_Skin_2	skin	16	660	470	0.712121
Mat_Cu_Skin_2	skin	17	580	380	0.655172
Mat_Cu_Skin_2	skin	18	680	480	0.705882
Mat_Cu_Skin_2	skin	19	600	400	0.666667
Mat_Cu_Skin_2	skin	20	570	450	0.789474
Mat_Cu_Skin_2	skin	21	540	470	0.87037
Mat_Cu_Skin_2	skin	22	770	410	0.532468
Mat_Cu_Skin_2	skin	23	580	510	0.87931
Mat_Cu_Skin_2	skin	24	680	360	0.529412
Mat_Cu_Skin_2	skin	25	600	400	0.666667
Mat_Cu_Skin_2	skin	26	680	390	0.573529
Mat_Cu_Skin_2	skin	27	640	430	0.671875
Mat_Cu_Skin_2	skin	28	580	390	0.672414
Mat_Cu_Skin_2	skin	29	590	480	0.813559
Mat_Cu_Skin_2	skin	30	700	420	0.6
Mat_Cu_Skin_2	skin	31	720	450	0.625
Mat_Cu_Skin_2	skin	32	680	530	0.779412
Mat_Cu_Skin_2	skin	33	570	430	0.754386
Mat_Cu_Skin_2	skin	34	760	400	0.526316
Mat_Cu_Skin_2	skin	35	740	460	0.621622
Mat_Cu_Skin_2	skin	36	590	320	0.542373
Mat_Cu_Skin_2	skin	37	500	500	1
Mat_Cu_Skin_2	skin	38	790	460	0.582278
Mat_Cu_Skin_2	skin	39	710	460	0.647887
Mat_Cu_Skin_2	skin	40	640	440	0.6875
Mat_Cu_Skin_2	skin	41	650	420	0.646154
Mat_Cu_Skin_2	skin	42	700	400	0.571429
Mat_Cu_Skin_2	skin	43	570	380	0.666667
Mat_Cu_Skin_2	skin	44	610	440	0.721311
Mat_Cu_Skin_2	skin	45	830	490	0.590361
Mat_Cu_Skin_2	skin	46	650	430	0.661538
Mat_Cu_Skin_2	skin	47	640	430	0.671875
Mat_Cu_Skin_2	skin	48	640	510	0.796875
Mat_Cu_Skin_2	skin	49	620	460	0.741935
Mat_Cu_Skin_2	skin	50	600	440	0.733333
Mat_Cu_Skin_3	skin	1	480	430	0.895833
Mat_Cu_Skin_3	skin	2	530	410	0.773585
Mat_Cu_Skin_3	skin	3	470	330	0.702128
Mat_Cu_Skin_3	skin	4	460	370	0.804348
Mat_Cu_Skin_3	skin	5	510	410	0.803922
Mat_Cu_Skin_3	skin	6	550	340	0.618182
Mat_Cu_Skin_3	skin	7	530	490	0.924528
Mat_Cu_Skin_3	skin	8	560	380	0.678571
Mat_Cu_Skin_3	skin	9	800	560	0.7
Mat_Cu_Skin_3	skin	10	580	470	0.810345
Mat_Cu_Skin_3	skin	11	470	400	0.851064
Mat_Cu_Skin_3	skin	12	450	400	0.888889
Mat_Cu_Skin_3	skin	13	610	530	0.868852
Mat_Cu_Skin_3	skin	14	670	460	0.686567
Mat_Cu_Skin_3	skin	15	630	460	0.730159
Mat_Cu_Skin_3	skin	16	600	460	0.766667
Mat_Cu_Skin_3	skin	17	400	330	0.825
Mat_Cu_Skin_3	skin	18	540	340	0.62963
Mat_Cu_Skin_3	skin	19	480	360	0.75
Mat_Cu_Skin_3	skin	20	500	340	0.68
Mat_Cu_Skin_3	skin	21	580	430	0.741379
Mat_Cu_Skin_3	skin	22	550	390	0.709091
Mat_Cu_Skin_3	skin	23	640	420	0.65625
Mat_Cu_Skin_3	skin	24	600	390	0.65
Mat_Cu_Skin_3	skin	25	500	360	0.72
Mat_Cu_Skin_3	skin	26	620	450	0.725806
Mat_Cu_Skin_3	skin	27	580	420	0.724138
Mat_Cu_Skin_3	skin	28	540	360	0.666667
Mat_Cu_Skin_3	skin	29	590	350	0.59322
Mat_Cu_Skin_3	skin	30	570	350	0.614035
Mat_Cu_Skin_3	skin	31	520	310	0.596154
Mat_Cu_Skin_3	skin	32	540	310	0.574074
Mat_Cu_Skin_3	skin	33	550	350	0.636364
Mat_Cu_Skin_3	skin	34	450	400	0.888889
Mat_Cu_Skin_3	skin	35	450	420	0.933333
Mat_Cu_Skin_3	skin	36	490	370	0.755102
Mat_Cu_Skin_3	skin	37	560	310	0.553571
Mat_Cu_Skin_3	skin	38	480	390	0.8125
Mat_Cu_Skin_3	skin	39	660	450	0.681818
Mat_Cu_Skin_3	skin	40	520	430	0.826923
Mat_Cu_Skin_3	skin	41	610	370	0.606557
Mat_Cu_Skin_3	skin	42	660	390	0.590909
Mat_Cu_Skin_3	skin	43	490	410	0.836735
Mat_Cu_Skin_3	skin	44	590	500	0.847458
Mat_Cu_Skin_3	skin	45	650	410	0.630769
Mat_Cu_Skin_3	skin	46	630	480	0.761905
Mat_Cu_Skin_3	skin	47	550	360	0.654545
Mat_Cu_Skin_3	skin	48	530	390	0.735849
Mat_Cu_Skin_3	skin	49	660	460	0.69697
Mat_Cu_Skin_3	skin	50	560	370	0.660714
Mat_DD_Liver_1	Liver	1	840	830	0.988095
Mat_DD_Liver_1	Liver	2	1190	680	0.571429
Mat_DD_Liver_1	Liver	3	930	570	0.612903
Mat_DD_Liver_1	Liver	4	850	560	0.658824
Mat_DD_Liver_1	Liver	5	890	610	0.685393
Mat_DD_Liver_1	Liver	6	610	610	1
Mat_DD_Liver_1	Liver	7	970	580	0.597938
Mat_DD_Liver_1	Liver	8	680	600	0.882353
Mat_DD_Liver_1	Liver	9	750	620	0.826667
Mat_DD_Liver_1	Liver	10	870	780	0.896552
Mat_DD_Liver_1	Liver	11	690	600	0.869565
Mat_DD_Liver_1	Liver	12	700	490	0.7
Mat_DD_Liver_1	Liver	13	720	620	0.861111
Mat_DD_Liver_1	Liver	14	760	600	0.789474
Mat_DD_Liver_1	Liver	15	960	560	0.583333
Mat_DD_Liver_1	Liver	16	760	530	0.697368
Mat_DD_Liver_1	Liver	17	720	580	0.805556
Mat_DD_Liver_1	Liver	18	810	730	0.901235
Mat_DD_Liver_1	Liver	19	860	540	0.627907
Mat_DD_Liver_1	Liver	20	750	620	0.826667
Mat_DD_Liver_1	Liver	21	880	550	0.625
Mat_DD_Liver_1	Liver	22	830	550	0.662651
Mat_DD_Liver_1	Liver	23	740	520	0.702703
Mat_DD_Liver_1	Liver	24	950	590	0.621053
Mat_DD_Liver_1	Liver	25	710	590	0.830986
Mat_DD_Liver_1	Liver	26	830	670	0.807229
Mat_DD_Liver_1	Liver	27	710	590	0.830986
Mat_DD_Liver_1	Liver	28	820	580	0.707317
Mat_DD_Liver_1	Liver	29	760	760	1
Mat_DD_Liver_1	Liver	30	910	660	0.725275
Mat_DD_Liver_1	Liver	31	700	540	0.771429
Mat_DD_Liver_1	Liver	32	1000	600	0.6
Mat_DD_Liver_1	Liver	33	1020	780	0.764706
Mat_DD_Liver_1	Liver	34	730	500	0.684932
Mat_DD_Liver_1	Liver	35	720	580	0.805556
Mat_DD_Liver_1	Liver	36	750	610	0.813333
Mat_DD_Liver_1	Liver	37	790	560	0.708861
Mat_DD_Liver_1	Liver	38	810	570	0.703704
Mat_DD_Liver_1	Liver	39	890	580	0.651685
Mat_DD_Liver_1	Liver	40	780	530	0.679487
Mat_DD_Liver_1	Liver	41	770	540	0.701299
Mat_DD_Liver_1	Liver	42	840	730	0.869048
Mat_DD_Liver_1	Liver	43	1010	710	0.70297
Mat_DD_Liver_1	Liver	44	890	740	0.831461
Mat_DD_Liver_1	Liver	45	910	850	0.934066
Mat_DD_Liver_1	Liver	46	810	550	0.679012
Mat_DD_Liver_1	Liver	47	830	630	0.759036
Mat_DD_Liver_1	Liver	48	790	510	0.64557
Mat_DD_Liver_1	Liver	49	970	710	0.731959
Mat_DD_Liver_1	Liver	50	760	580	0.763158
Mat_DD_Liver_2	Liver	1	820	510	0.621951
Mat_DD_Liver_2	Liver	2	1140	600	0.526316
Mat_DD_Liver_2	Liver	3	750	520	0.693333
Mat_DD_Liver_2	Liver	4	690	560	0.811594
Mat_DD_Liver_2	Liver	5	860	620	0.72093
Mat_DD_Liver_2	Liver	6	830	700	0.843373
Mat_DD_Liver_2	Liver	7	600	380	0.633333
Mat_DD_Liver_2	Liver	8	730	600	0.821918
Mat_DD_Liver_2	Liver	9	660	350	0.530303
Mat_DD_Liver_2	Liver	10	680	660	0.970588
Mat_DD_Liver_2	Liver	11	1080	580	0.537037
Mat_DD_Liver_2	Liver	12	760	600	0.789474
Mat_DD_Liver_2	Liver	13	660	520	0.787879
Mat_DD_Liver_2	Liver	14	700	620	0.885714
Mat_DD_Liver_2	Liver	15	840	740	0.880952
Mat_DD_Liver_2	Liver	16	770	490	0.636364
Mat_DD_Liver_2	Liver	17	770	570	0.74026
Mat_DD_Liver_2	Liver	18	930	580	0.623656
Mat_DD_Liver_2	Liver	19	940	550	0.585106
Mat_DD_Liver_2	Liver	20	740	540	0.72973
Mat_DD_Liver_2	Liver	21	700	610	0.871429
Mat_DD_Liver_2	Liver	22	750	640	0.853333
Mat_DD_Liver_2	Liver	23	840	450	0.535714
Mat_DD_Liver_2	Liver	24	780	660	0.846154
Mat_DD_Liver_2	Liver	25	760	520	0.684211
Mat_DD_Liver_2	Liver	26	910	580	0.637363
Mat_DD_Liver_2	Liver	27	710	580	0.816901
Mat_DD_Liver_2	Liver	28	820	600	0.731707
Mat_DD_Liver_2	Liver	29	560	520	0.928571
Mat_DD_Liver_2	Liver	30	700	640	0.914286
Mat_DD_Liver_2	Liver	31	670	580	0.865672
Mat_DD_Liver_2	Liver	32	760	740	0.973684
Mat_DD_Liver_2	Liver	33	840	540	0.642857
Mat_DD_Liver_2	Liver	34	670	490	0.731343
Mat_DD_Liver_2	Liver	35	700	560	0.8
Mat_DD_Liver_2	Liver	36	730	570	0.780822
Mat_DD_Liver_2	Liver	37	820	520	0.634146
Mat_DD_Liver_2	Liver	38	660	480	0.727273
Mat_DD_Liver_2	Liver	39	640	490	0.765625
Mat_DD_Liver_2	Liver	40	680	590	0.867647
Mat_DD_Liver_2	Liver	41	770	560	0.727273
Mat_DD_Liver_2	Liver	42	1100	770	0.7
Mat_DD_Liver_2	Liver	43	700	550	0.785714
Mat_DD_Liver_2	Liver	44	680	550	0.808824
Mat_DD_Liver_2	Liver	45	820	780	0.95122
Mat_DD_Liver_2	Liver	46	800	580	0.725
Mat_DD_Liver_2	Liver	47	640	460	0.71875
Mat_DD_Liver_2	Liver	48	800	630	0.7875
Mat_DD_Liver_2	Liver	49	690	580	0.84058
Mat_DD_Liver_2	Liver	50	790	520	0.658228
Mat_DD_Liver_3	Liver	1	630	490	0.777778
Mat_DD_Liver_3	Liver	2	590	500	0.847458
Mat_DD_Liver_3	Liver	3	550	450	0.818182
Mat_DD_Liver_3	Liver	4	850	700	0.823529
Mat_DD_Liver_3	Liver	5	700	510	0.728571
Mat_DD_Liver_3	Liver	6	740	460	0.621622
Mat_DD_Liver_3	Liver	7	670	670	1
Mat_DD_Liver_3	Liver	8	560	440	0.785714
Mat_DD_Liver_3	Liver	9	760	560	0.736842
Mat_DD_Liver_3	Liver	10	540	380	0.703704
Mat_DD_Liver_3	Liver	11	710	470	0.661972
Mat_DD_Liver_3	Liver	12	630	500	0.793651
Mat_DD_Liver_3	Liver	13	740	510	0.689189
Mat_DD_Liver_3	Liver	14	700	500	0.714286
Mat_DD_Liver_3	Liver	15	650	540	0.830769
Mat_DD_Liver_3	Liver	16	620	510	0.822581
Mat_DD_Liver_3	Liver	17	680	490	0.720588
Mat_DD_Liver_3	Liver	18	580	500	0.862069
Mat_DD_Liver_3	Liver	19	580	420	0.724138
Mat_DD_Liver_3	Liver	20	820	570	0.695122
Mat_DD_Liver_3	Liver	21	740	470	0.635135
Mat_DD_Liver_3	Liver	22	670	450	0.671642
Mat_DD_Liver_3	Liver	23	610	430	0.704918
Mat_DD_Liver_3	Liver	24	720	530	0.736111
Mat_DD_Liver_3	Liver	25	600	510	0.85
Mat_DD_Liver_3	Liver	26	700	640	0.914286
Mat_DD_Liver_3	Liver	27	800	610	0.7625
Mat_DD_Liver_3	Liver	28	640	420	0.65625
Mat_DD_Liver_3	Liver	29	670	600	0.895522
Mat_DD_Liver_3	Liver	30	640	480	0.75
Mat_DD_Liver_3	Liver	31	640	550	0.859375
Mat_DD_Liver_3	Liver	32	550	430	0.781818
Mat_DD_Liver_3	Liver	33	630	540	0.857143
Mat_DD_Liver_3	Liver	34	570	520	0.912281
Mat_DD_Liver_3	Liver	35	680	490	0.720588
Mat_DD_Liver_3	Liver	36	560	510	0.910714
Mat_DD_Liver_3	Liver	37	640	360	0.5625
Mat_DD_Liver_3	Liver	38	700	670	0.957143
Mat_DD_Liver_3	Liver	39	620	390	0.629032
Mat_DD_Liver_3	Liver	40	770	460	0.597403
Mat_DD_Liver_3	Liver	41	860	650	0.755814
Mat_DD_Liver_3	Liver	42	670	560	0.835821
Mat_DD_Liver_3	Liver	43	700	500	0.714286
Mat_DD_Liver_3	Liver	44	660	460	0.69697
Mat_DD_Liver_3	Liver	45	590	460	0.779661
Mat_DD_Liver_3	Liver	46	550	530	0.963636
Mat_DD_Liver_3	Liver	47	680	520	0.764706
Mat_DD_Liver_3	Liver	48	760	510	0.671053
Mat_DD_Liver_3	Liver	49	650	620	0.953846
Mat_DD_Liver_3	Liver	50	840	560	0.666667
Mat_DD_Skin_1	Skin	1	690	470	0.681159
Mat_DD_Skin_1	Skin	2	880	470	0.534091
Mat_DD_Skin_1	Skin	3	560	450	0.803571
Mat_DD_Skin_1	Skin	4	600	480	0.8
Mat_DD_Skin_1	Skin	5	680	470	0.691176
Mat_DD_Skin_1	Skin	6	710	520	0.732394
Mat_DD_Skin_1	Skin	7	760	570	0.75
Mat_DD_Skin_1	Skin	8	600	470	0.783333
Mat_DD_Skin_1	Skin	9	620	480	0.774194
Mat_DD_Skin_1	Skin	10	710	500	0.704225
Mat_DD_Skin_1	Skin	11	760	470	0.618421
Mat_DD_Skin_1	Skin	12	680	560	0.823529
Mat_DD_Skin_1	Skin	13	810	430	0.530864
Mat_DD_Skin_1	Skin	14	770	490	0.636364
Mat_DD_Skin_1	Skin	15	640	460	0.71875
Mat_DD_Skin_1	Skin	16	680	440	0.647059
Mat_DD_Skin_1	Skin	17	720	470	0.652778
Mat_DD_Skin_1	Skin	18	630	430	0.68254
Mat_DD_Skin_1	Skin	19	730	530	0.726027
Mat_DD_Skin_1	Skin	20	760	440	0.578947
Mat_DD_Skin_1	Skin	21	650	330	0.507692
Mat_DD_Skin_1	Skin	22	650	490	0.753846
Mat_DD_Skin_1	Skin	23	710	480	0.676056
Mat_DD_Skin_1	Skin	24	640	600	0.9375
Mat_DD_Skin_1	Skin	25	820	540	0.658537
Mat_DD_Skin_1	Skin	26	820	420	0.512195
Mat_DD_Skin_1	Skin	27	800	500	0.625
Mat_DD_Skin_1	Skin	28	790	460	0.582278
Mat_DD_Skin_1	Skin	29	690	400	0.57971
Mat_DD_Skin_1	Skin	30	730	500	0.684932
Mat_DD_Skin_1	Skin	31	640	480	0.75
Mat_DD_Skin_1	Skin	32	710	430	0.605634
Mat_DD_Skin_1	Skin	33	600	410	0.683333
Mat_DD_Skin_1	Skin	34	740	430	0.581081
Mat_DD_Skin_1	Skin	35	760	490	0.644737
Mat_DD_Skin_1	Skin	36	710	470	0.661972
Mat_DD_Skin_1	Skin	37	710	460	0.647887
Mat_DD_Skin_1	Skin	38	670	450	0.671642
Mat_DD_Skin_1	Skin	39	710	380	0.535211
Mat_DD_Skin_1	Skin	40	640	530	0.828125
Mat_DD_Skin_1	Skin	41	760	450	0.592105
Mat_DD_Skin_1	Skin	42	870	450	0.517241
Mat_DD_Skin_1	Skin	43	700	480	0.685714
Mat_DD_Skin_1	Skin	44	550	460	0.836364
Mat_DD_Skin_1	Skin	45	690	550	0.797101
Mat_DD_Skin_1	Skin	46	800	450	0.5625
Mat_DD_Skin_1	Skin	47	750	460	0.613333
Mat_DD_Skin_1	Skin	48	650	460	0.707692
Mat_DD_Skin_1	Skin	49	840	580	0.690476
Mat_DD_Skin_1	Skin	50	780	390	0.5
Mat_DD_Skin_2	Skin	1	710	470	0.661972
Mat_DD_Skin_2	Skin	2	620	400	0.645161
Mat_DD_Skin_2	Skin	3	600	440	0.733333
Mat_DD_Skin_2	Skin	4	700	400	0.571429
Mat_DD_Skin_2	Skin	5	660	390	0.590909
Mat_DD_Skin_2	Skin	6	690	450	0.652174
Mat_DD_Skin_2	Skin	7	500	380	0.76
Mat_DD_Skin_2	Skin	8	800	540	0.675
Mat_DD_Skin_2	Skin	9	590	440	0.745763
Mat_DD_Skin_2	Skin	10	770	520	0.675325
Mat_DD_Skin_2	Skin	11	590	420	0.711864
Mat_DD_Skin_2	Skin	12	620	560	0.903226
Mat_DD_Skin_2	Skin	13	590	350	0.59322
Mat_DD_Skin_2	Skin	14	680	380	0.558824
Mat_DD_Skin_2	Skin	15	520	450	0.865385
Mat_DD_Skin_2	Skin	16	640	420	0.65625
Mat_DD_Skin_2	Skin	17	770	490	0.636364
Mat_DD_Skin_2	Skin	18	550	400	0.727273
Mat_DD_Skin_2	Skin	19	820	460	0.560976
Mat_DD_Skin_2	Skin	20	590	480	0.813559
Mat_DD_Skin_2	Skin	21	580	470	0.810345
Mat_DD_Skin_2	Skin	22	870	550	0.632184
Mat_DD_Skin_2	Skin	23	690	370	0.536232
Mat_DD_Skin_2	Skin	24	700	420	0.6
Mat_DD_Skin_2	Skin	25	630	470	0.746032
Mat_DD_Skin_2	Skin	26	620	500	0.806452
Mat_DD_Skin_2	Skin	27	600	460	0.766667
Mat_DD_Skin_2	Skin	28	730	500	0.684932
Mat_DD_Skin_2	Skin	29	590	360	0.610169
Mat_DD_Skin_2	Skin	30	640	450	0.703125
Mat_DD_Skin_2	Skin	31	630	580	0.920635
Mat_DD_Skin_2	Skin	32	690	480	0.695652
Mat_DD_Skin_2	Skin	33	790	430	0.544304
Mat_DD_Skin_2	Skin	34	690	420	0.608696
Mat_DD_Skin_2	Skin	35	600	460	0.766667
Mat_DD_Skin_2	Skin	36	680	440	0.647059
Mat_DD_Skin_2	Skin	37	800	460	0.575
Mat_DD_Skin_2	Skin	38	650	470	0.723077
Mat_DD_Skin_2	Skin	39	780	440	0.564103
Mat_DD_Skin_2	Skin	40	680	440	0.647059
Mat_DD_Skin_2	Skin	41	650	420	0.646154
Mat_DD_Skin_2	Skin	42	610	380	0.622951
Mat_DD_Skin_2	Skin	43	590	450	0.762712
Mat_DD_Skin_2	Skin	44	700	440	0.628571
Mat_DD_Skin_2	Skin	45	680	390	0.573529
Mat_DD_Skin_2	Skin	46	680	380	0.558824
Mat_DD_Skin_2	Skin	47	690	470	0.681159
Mat_DD_Skin_2	Skin	48	520	450	0.865385
Mat_DD_Skin_2	Skin	49	660	420	0.636364
Mat_DD_Skin_2	Skin	50	860	580	0.674419
Mat_DD_Skin_3	Skin	1	650	470	0.723077
Mat_DD_Skin_3	Skin	2	600	450	0.75
Mat_DD_Skin_3	Skin	3	660	480	0.727273
Mat_DD_Skin_3	Skin	4	630	480	0.761905
Mat_DD_Skin_3	Skin	5	560	420	0.75
Mat_DD_Skin_3	Skin	6	690	420	0.608696
Mat_DD_Skin_3	Skin	7	570	390	0.684211
Mat_DD_Skin_3	Skin	8	610	370	0.606557
Mat_DD_Skin_3	Skin	9	640	580	0.90625
Mat_DD_Skin_3	Skin	10	610	470	0.770492
Mat_DD_Skin_3	Skin	11	620	490	0.790323
Mat_DD_Skin_3	Skin	12	500	410	0.82
Mat_DD_Skin_3	Skin	13	590	440	0.745763
Mat_DD_Skin_3	Skin	14	650	440	0.676923
Mat_DD_Skin_3	Skin	15	490	460	0.938776
Mat_DD_Skin_3	Skin	16	570	380	0.666667
Mat_DD_Skin_3	Skin	17	630	370	0.587302
Mat_DD_Skin_3	Skin	18	620	410	0.66129
Mat_DD_Skin_3	Skin	19	600	490	0.816667
Mat_DD_Skin_3	Skin	20	600	380	0.633333
Mat_DD_Skin_3	Skin	21	680	400	0.588235
Mat_DD_Skin_3	Skin	22	720	400	0.555556
Mat_DD_Skin_3	Skin	23	790	400	0.506329
Mat_DD_Skin_3	Skin	24	690	410	0.594203
Mat_DD_Skin_3	Skin	25	770	430	0.558442
Mat_DD_Skin_3	Skin	26	590	420	0.711864
Mat_DD_Skin_3	Skin	27	550	490	0.890909
Mat_DD_Skin_3	Skin	28	600	420	0.7
Mat_DD_Skin_3	Skin	29	480	420	0.875
Mat_DD_Skin_3	Skin	30	620	460	0.741935
Mat_DD_Skin_3	Skin	31	520	360	0.692308
Mat_DD_Skin_3	Skin	32	690	460	0.666667
Mat_DD_Skin_3	Skin	33	650	450	0.692308
Mat_DD_Skin_3	Skin	34	500	490	0.98
Mat_DD_Skin_3	Skin	35	670	450	0.671642
Mat_DD_Skin_3	Skin	36	740	400	0.540541
Mat_DD_Skin_3	Skin	37	740	440	0.594595
Mat_DD_Skin_3	Skin	38	580	400	0.689655
Mat_DD_Skin_3	Skin	39	560	480	0.857143
Mat_DD_Skin_3	Skin	40	820	480	0.585366
Mat_DD_Skin_3	Skin	41	700	490	0.7
Mat_DD_Skin_3	Skin	42	560	460	0.821429
Mat_DD_Skin_3	Skin	43	570	530	0.929825
Mat_DD_Skin_3	Skin	44	690	400	0.57971
Mat_DD_Skin_3	Skin	45	800	460	0.575
Mat_DD_Skin_3	Skin	46	600	390	0.65
Mat_DD_Skin_3	Skin	47	660	440	0.666667
Mat_DD_Skin_3	Skin	48	650	470	0.723077
Mat_DD_Skin_3	Skin	49	570	470	0.824561
Mat_DD_Skin_3	Skin	50	590	440	0.745763

## Sheet: G48696
Rossi, V., Webb, S.M., and McNamara, M., 2021, Maturation experiments reveal bias in the chemistry of fossil melanosomes: Geology, v. 49, https://doi.org/10.1130/G48696.1
